# Supplementary material for: Potential Unmet Needs in Acute Treatment of Migraine in Japan: Results of the OVERCOME (Japan) Study
Source: PubMed Central journal article supplement — Adv Ther. 2022 Sep 12;39(11):5176–90. doi: 10.1007/s12325-022-02289-w (PMC9525323; doi:10.1007/s12325-022-02289-w), 2022-09-12
Supplement: 12325_2022_2289_MOESM1_ESM.pdf [file 12325_2022_2289_MOESM1_ESM.pdf]

# Potential Unmet Needs in Acute Treatment of Migraine in Japan: Results of the OVERCOME (Japan) Study

Takao Takeshima, Kaname Ueda, Mika Komori, Anthony J. Zagar, Yongin Kim, Dena H. Jaffe, Yasuhiko Matsumori, Koichi Hirata

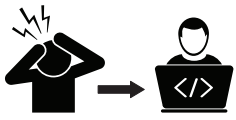

OVERCOME (Japan) was a cross-sectional, population-based web survey of people with migraine in Japan

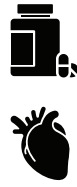

Survey questions included:

- Current acute medication use
- Medication effectiveness (mTOQ-4)
- Cardiovascular history and risk factors

17,071 people with migraine completed the survey

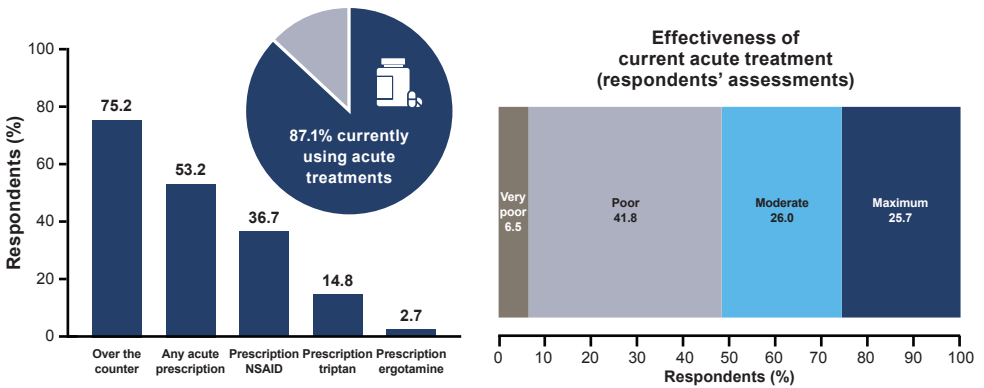

## Potential unmet needs in acute treatment of migraine in Japan

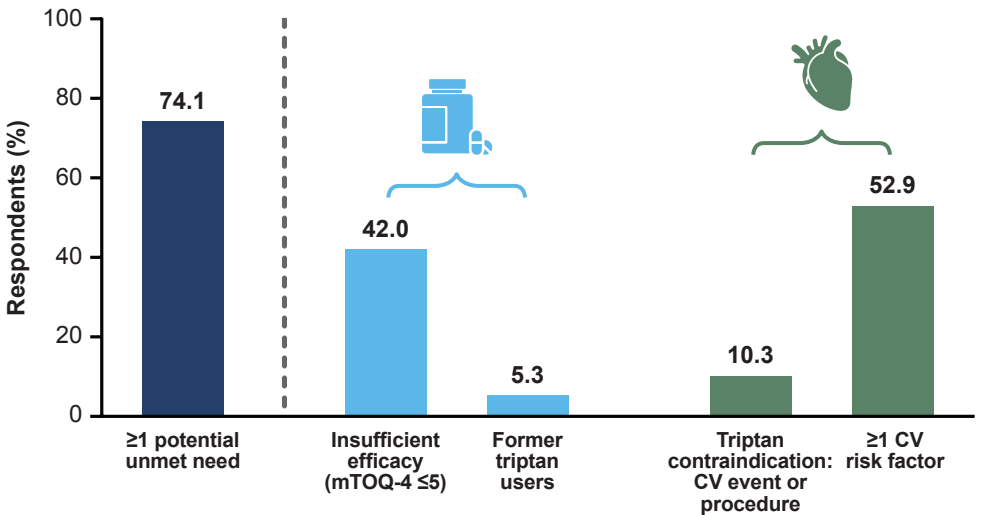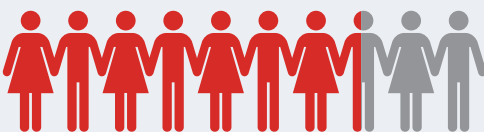

74.1%

Nearly three-quarters of people with migraine in Japan may have potential unmet needs for acute treatment

CV cardiovascular, mTOQ-4 4-Item Migraine Treatment Optimization Questionnaire, NSAID nonsteroidal anti-inflammatory drug
