# Supplementary material for: Potential Unmet Needs in Acute Treatment of Migraine in Japan: Results of the OVERCOME (Japan) Study
Source: PubMed Central journal article supplement — Adv Ther. 2022 Sep 12;39(11):5176–90. doi: 10.1007/s12325-022-02289-w (PMC9525323; doi:10.1007/s12325-022-02289-w), 2022-09-12
Supplement: 12325_2022_2289_MOESM2_ESM.pdf [file 12325_2022_2289_MOESM2_ESM.pdf]

## **SUPPLEMENTARY MATERIAL**

### **TITLE**

Potential Unmet Needs in Acute Treatment of Migraine in Japan: Results of the  
OVERCOME (Japan) Study

### **AUTHORS**

Takao TAKESHIMA<sup>1</sup>, MD, PhD

Kaname UEDA<sup>2</sup>, PhD (<https://orcid.org/0000-0003-1967-9829>)

Mika KOMORI<sup>2</sup>, MD, PhD

Anthony J. ZAGAR<sup>3</sup>, PhD

Yongin KIM<sup>3</sup>, MS

Dena H. JAFFE<sup>4</sup>, PhD

Yasuhiko MATSUMORI<sup>5</sup>, MD, PhD

Koichi HIRATA<sup>6</sup>, MD, PhD

### **AUTHORS' AFFILIATIONS**

<sup>1</sup> Tominaga Hospital, Osaka, Japan

<sup>2</sup> Eli Lilly Japan K.K., Kobe, Japan

<sup>3</sup> Eli Lilly and Company, Indianapolis, IN, USA

<sup>4</sup> Cerner Enviza, Jerusalem, Israel

<sup>5</sup> Sendai Headache and Neurology Clinic, Sendai, Japan

<sup>6</sup> Dokkyo Medical University, Mibu, Japan

### **AUTHOR FOR CORRESPONDENCE**

Mika Komori

Japan Drug Development and Medical Affairs

Eli Lilly Japan K.K.

5-1-28, Isogamidori, Chuo-ku

Kobe-shi 651-0086

Japan

Tel: +81-78-242-8391

Email: [komori\\_mika@lilly.com](mailto:komori_mika@lilly.com)

**Table S1** Triptan use among OVERCOME (Japan) survey respondents

|                                                                                    | Total<br>N = 17,071 | Monthly headache days category |            | p-values <sup>a</sup> |
|------------------------------------------------------------------------------------|---------------------|--------------------------------|------------|-----------------------|
|                                                                                    |                     | 0–3                            | ≥4         |                       |
|                                                                                    |                     | n = 11,498                     | n = 5573   |                       |
| Reasons for delaying taking triptans <sup>b</sup>                                  | n = 759             | n = 405                        | n = 354    |                       |
| I wait to see whether the attack will go away on its own                           | 273 (36.0)          | 143 (35.3)                     | 130 (36.7) | 0.6854 <sup>c</sup>   |
| I try to save it for really bad attacks                                            | 250 (32.9)          | 118 (29.1)                     | 132 (37.3) | 0.0171 <sup>c</sup>   |
| I may not realize that it is going to be a migraine or severe headache             | 229 (30.2)          | 118 (29.1)                     | 111 (31.4) | 0.5062 <sup>c</sup>   |
| I like to try a different medication first to see if it works                      | 180 (23.7)          | 80 (19.8)                      | 100 (28.3) | 0.0060 <sup>c</sup>   |
| I am afraid it will stop working if I take it too often                            | 163 (21.5)          | 67 (16.5)                      | 96 (27.1)  | 0.0004 <sup>c</sup>   |
| I am concerned about the side effects                                              | 132 (17.4)          | 68 (16.8)                      | 64 (18.1)  | 0.6402 <sup>c</sup>   |
| It costs too much to use/I do not want to spend the money                          | 129 (17.0)          | 50 (12.4)                      | 79 (22.3)  | 0.0003 <sup>c</sup>   |
| I may not have it with me                                                          | 128 (16.9)          | 64 (15.8)                      | 64 (18.1)  | 0.4034 <sup>c</sup>   |
| I'm concerned I will run out before getting a new prescription                     | 125 (16.5)          | 54 (13.3)                      | 71 (20.1)  | 0.0127 <sup>c</sup>   |
| Insurance limits how much of it I get each month                                   | 101 (13.3)          | 33 (8.2)                       | 68 (19.2)  | <0.0001 <sup>c</sup>  |
| I am in a situation where I cannot take it                                         | 95 (12.5)           | 43 (10.6)                      | 52 (14.7)  | 0.0908 <sup>c</sup>   |
| I like to try using a non-medication approach                                      | 84 (11.1)           | 49 (12.1)                      | 35 (9.9)   | 0.3326 <sup>c</sup>   |
| I do not want others to see me taking medication for a migraine or severe headache | 69 (9.1)            | 39 (9.6)                       | 30 (8.5)   | 0.5808 <sup>c</sup>   |
| Other reasons                                                                      | 24 (3.2)            | 9 (2.2)                        | 15 (4.2)   | 0.1135 <sup>c</sup>   |

|                                                                                                              | Total<br>N = 17,071 | Monthly headache days category |            | p-values <sup>a</sup> |
|--------------------------------------------------------------------------------------------------------------|---------------------|--------------------------------|------------|-----------------------|
|                                                                                                              |                     | 0–3                            | ≥4         |                       |
|                                                                                                              |                     | n = 11,498                     | n = 5573   |                       |
| At least one triptan failure                                                                                 | n = 1929            | n = 1152                       | n = 777    |                       |
| Reasons for stopping triptans <sup>b</sup>                                                                   |                     |                                |            |                       |
| It was not working                                                                                           | 419 (21.7)          | 228 (19.8)                     | 191 (24.6) | 0.0123 <sup>c</sup>   |
| Other medications work better for my migraine/severe headaches                                               | 396 (20.5)          | 229 (19.9)                     | 167 (21.5) | 0.3892 <sup>c</sup>   |
| My migraine/severe headaches got better                                                                      | 309 (16.0)          | 213 (18.5)                     | 96 (12.4)  | 0.0003 <sup>c</sup>   |
| It cost too much to take/I did not want to spend the money                                                   | 307 (15.9)          | 177 (15.4)                     | 130 (16.7) | 0.4210 <sup>c</sup>   |
| I was concerned about the side effects/the effects of using it too often                                     | 256 (13.3)          | 144 (12.5)                     | 112 (14.4) | 0.2242 <sup>c</sup>   |
| Nausea/feeling sick to my stomach prevented me from taking it                                                | 192 (10.0)          | 116 (10.1)                     | 76 (9.8)   | 0.8357 <sup>c</sup>   |
| I was concerned about it interacting with another medication                                                 | 178 (9.2)           | 106 (9.2)                      | 72 (9.3)   | 0.9614 <sup>c</sup>   |
| I was not able to get into my doctor's office to get the medicine due to the coronavirus pandemic (COVID-19) | 164 (8.5)           | 111 (9.6)                      | 53 (6.8)   | 0.0297 <sup>c</sup>   |
| My doctor/healthcare provider recommended I stop                                                             | 144 (7.5)           | 95 (8.3)                       | 49 (6.3)   | 0.1118 <sup>c</sup>   |
| Another health condition prevented me from taking it                                                         | 144 (7.5)           | 85 (7.4)                       | 59 (7.6)   | 0.8602 <sup>c</sup>   |
| I did not want anyone to think I was just someone who complains                                              | 117 (6.1)           | 83 (7.2)                       | 34 (4.4)   | 0.0107 <sup>c</sup>   |
| A friend/family member recommended I stop                                                                    | 116 (6.0)           | 75 (6.5)                       | 41 (5.3)   | 0.2636 <sup>c</sup>   |
| Other reasons                                                                                                | 224 (11.6)          | 108 (9.4)                      | 116 (14.9) | 0.0002 <sup>c</sup>   |

Data are n (%)

<sup>a</sup> Pairwise comparisons between migraine headache days categories (0–3 vs. ≥4)

<sup>b</sup> Respondents could select more than one response

<sup>c</sup> Chi-square test, “yes” versus “no”
